# Supplementary material for: Generation of Monogenic Candidate Genes for Human Nephrotic Syndrome Using 3 Independent Approaches
Source: PubMed Central journal article supplement — Kidney Int Rep. 2020 Dec 3;6(2):460–71. doi: 10.1016/j.ekir.2020.11.013 (PMC7879125; doi:10.1016/j.ekir.2020.11.013), 2020-12-03
Supplement: mmc1.pdf [file mmc1.pdf]

## Search criteria for human monogenic causes of NS in mouse models

1. **MGI Search** “Nephrotic Syndrome” OR
  1. “Proteinuria” OR
  2. “Foot process effacement” OR
  3. “Glomerulonephritis”
2. Revalidation of found articles and criteria based on a subsequent PubMed search.
  1. EXCLUDE: Hypertension model, autoimmune disease related causes (e.g. “lupus”) or other causes leading to a nephritic phenotype

1. **PubMed Search**
  1. “Mouse model” AND “nephrotic”
  2. “Mice” AND “nephrotic”
  3. “Mice” AND “foot process effacement”
  4. “Mice” AND “proteinuria” AND “gene”
2. Validation of identified articles
  1. EXCLUDE: Hypertension model, autoimmune disease related causes (e.g. Lupus) or other causes leading to a nephritic phenotype

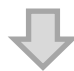

**Combining both approaches**

**Identification of 75 genes that represent monogenic causes of nephrotic syndrome/ proteinuria in mice**

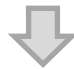

12 NS mouse models that were published after human NS genes excluded\*

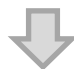

**63 candidates used in this study**

### Suppl. Fig. 1. Workflow for searching for mouse candidate genes via MGI and PubMed.

Two approaches were combined. A search in MGI was performed by filtering for “nephrotic syndrome”, OR “proteinuria”, OR “foot process effacement”, OR “glomerulonephritis”. Articles were read, and mouse models of hypertension, autoimmune disease related causes or nephritic syndrome were excluded. Results were combined with an additional PubMed search, in which the same exclusion criteria were used. 75 genes that represent monogenic causes of nephrotic syndrome in mice were identified. 12 out of these were excluded because the mouse phenotype was generated after the human equivalent was reported. \* see **Suppl. Table 3**.

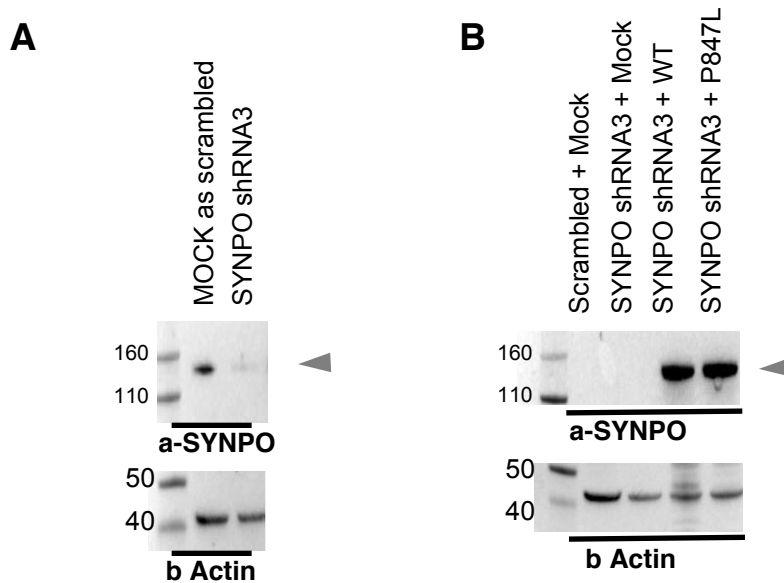

**Suppl. Fig. 2 A. *SYNPO* knockdown in human podocytes.**

Knockdown of *SYNPO* in podocytes was assessed by immuno blot, showing reduced protein expression in knockdown cells relative to scrambled control (grey arrow).

**Suppl. Fig. 2 B. Immuno blot from lysates of stable scrambled shRNA negative control and *SYNPO*-shRNA3 expression in human immortalized podocytes co-transfected for rescue construct of WT vs. p.P847L *SYNPO* constructs.**

Scrambled Mock and *SYNPO* shRNA3 + Mock confirm the strong reduction of *SYNPO* expression (lane 1 and 2). The mouse, wild type *Synpo* construct overexpression is shown in lane 3 to 4 (arrowhead).

**A**

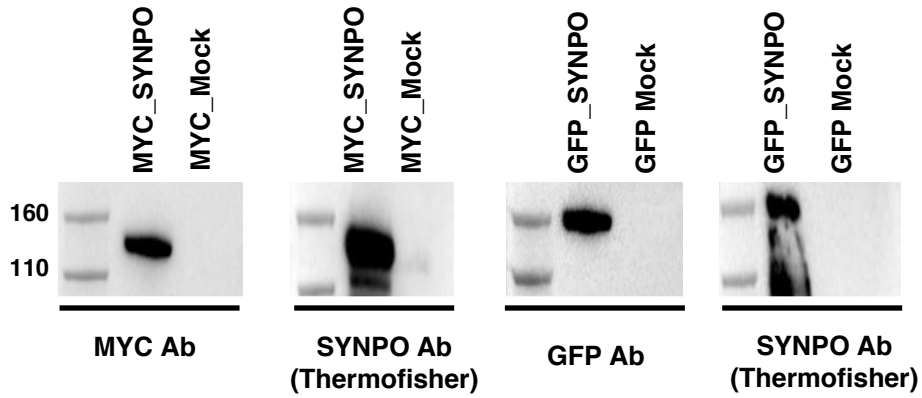

**Suppl. Fig. 3. SYNPO antibody and cDNA clone characterization.**

Human podocytes were transfected with either MYC MOCK vs. WT MYC SYNPO cDNA or GFP MOCK vs. WT GFP SYNPO cDNA constructs. MYC, GFP or SYNPO (PA5-56997, rabbit thermo fisher) antibodies were used.

Motamedi et al. (*Nat Commun.*, 17;5:4444, 2014)  
Lefebvre et al. (*Kidney Int.*, 88:321-31, 2015)

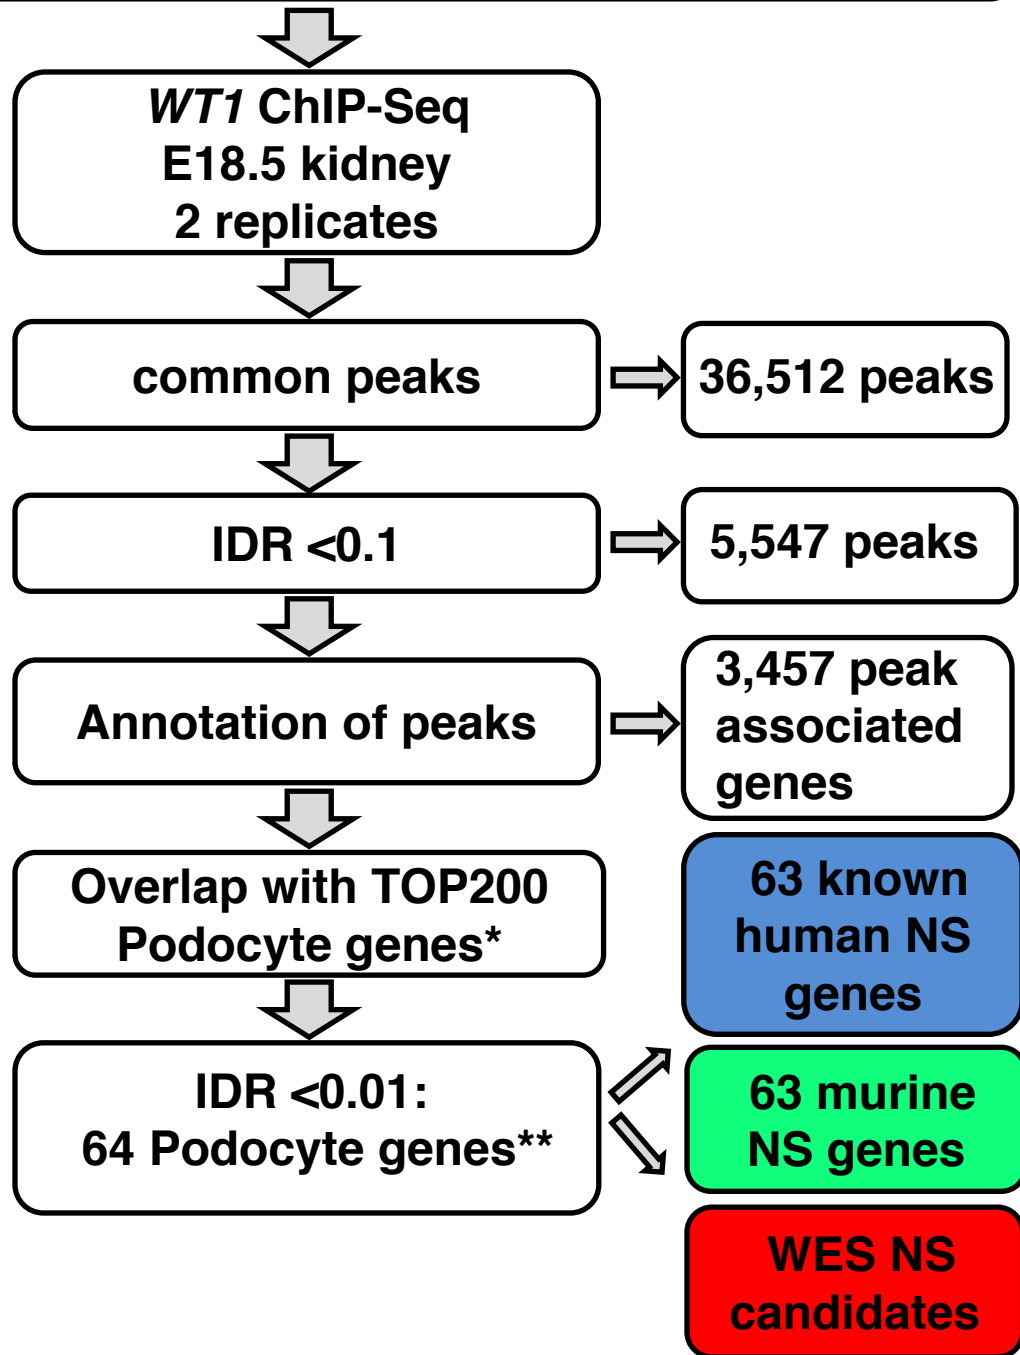

Suppl. Fig. 4. Workflow for filtering criteria from WT1 ChIP Seq data on E18.5 kidneys (2 replicates) published by Motamedi, (*Nat Commun*, 17;5:4444, 2014) and Lefebvre, (*Kidney Int*, 88:321-31, 2015).

Motamedi et al., performed in vivo WT1 ChIP-Seq analyses on E18.5 kidneys in two independent experiments. 36,512 peaks were identified. When using an IDR cutoff of  $\leq 0.1$  5,547 peaks were identified. After annotation of peaks, 3,457 peak associated genes were generated. Lefebvre et al., then overlapped this subset of genes, with the TOP200 podocytic genes and identified 64 podocytic potential WT1 downstream targets. MEME: multiple EM for motif elicitation; IDR, irreproducible discovery rate; \*gudmap, (Brunski et al., *PloS one*, 2011;6:e24640), \*\* MEME analysis was performed and identified *WT1* motif.

**A WHITTLE DOWN for 63 known human monogenic NS downstream of WT1 candidates**

|                               | Nr. of Genes | Monogenic known human NS GENES | % of KNOWN GENES in cohort | Fold enrichment for known human NS gene |
|-------------------------------|--------------|--------------------------------|----------------------------|-----------------------------------------|
| All genes in human genome     | 20,000       | 63                             | 0.3                        |                                         |
| All WT1 peak associated genes | 3,457        | 19                             | 0.55                       | 1.8x                                    |
| WT downstream candidate genes | 64           | 5                              | 7.8                        | 14.2x<br>26x                            |

**B WHITTLE DOWN for known mouse NS genes downstream of WT1 candidates**

|                               | Nr. of Genes | Monogenic known mouse NS GENES | % of KNOWN GENES in cohort | Fold enrichment for known murine NS gene |
|-------------------------------|--------------|--------------------------------|----------------------------|------------------------------------------|
| All genes in human genome     | 20,000       | 63                             | 0.31                       |                                          |
| All WT1 peak associated genes | 3,457        | 32                             | 0.925                      | 2.2x                                     |
| WT downstream candidate genes | 64           | 10                             | 15.6                       | 16.8 x<br>50.3x                          |

**C WHITTLE DOWN for human monogenic NS candidate genes resulting from our WES studies downstream of WT candidates**

|                               | Nr. of Genes | WES NS candidate genes | % of candidate GENES in cohort | Fold enrichment for WES candidate gene |
|-------------------------------|--------------|------------------------|--------------------------------|----------------------------------------|
| All genes in human genome     | 20,000       | 120                    | 0.6                            |                                        |
| All WT1 peak associated genes | 3,457        | 28                     | 0.81                           | 1.34x                                  |
| WT downstream candidate genes | 64           | 4                      | 6.25                           | 7.7x<br>10.4x                          |

**Suppl. Figure 5. Fold enrichment resulting from overlapping WT1 downstream targets (Lefebvre, *Kidney Int*, 88:321-31, 2015) when being overlapped with human and murine NS genes as positive controls.**

We compared the fold enrichment for either the **A**) human known monogenic NS genes, **B**) known monogenic mouse NS genes, **C**) human monogenic NS candidates resulting from WES within the cohort of all genes within the human genome (first row), all WT1 peak associated genes (middle row) and the 64 WT1 downstream candidates (lower row).

**A**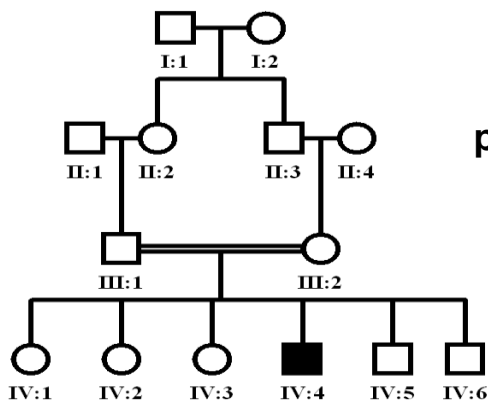

**FA-24**  
**c.2540C>T**  
**p.(Pro847Leu)**

**B**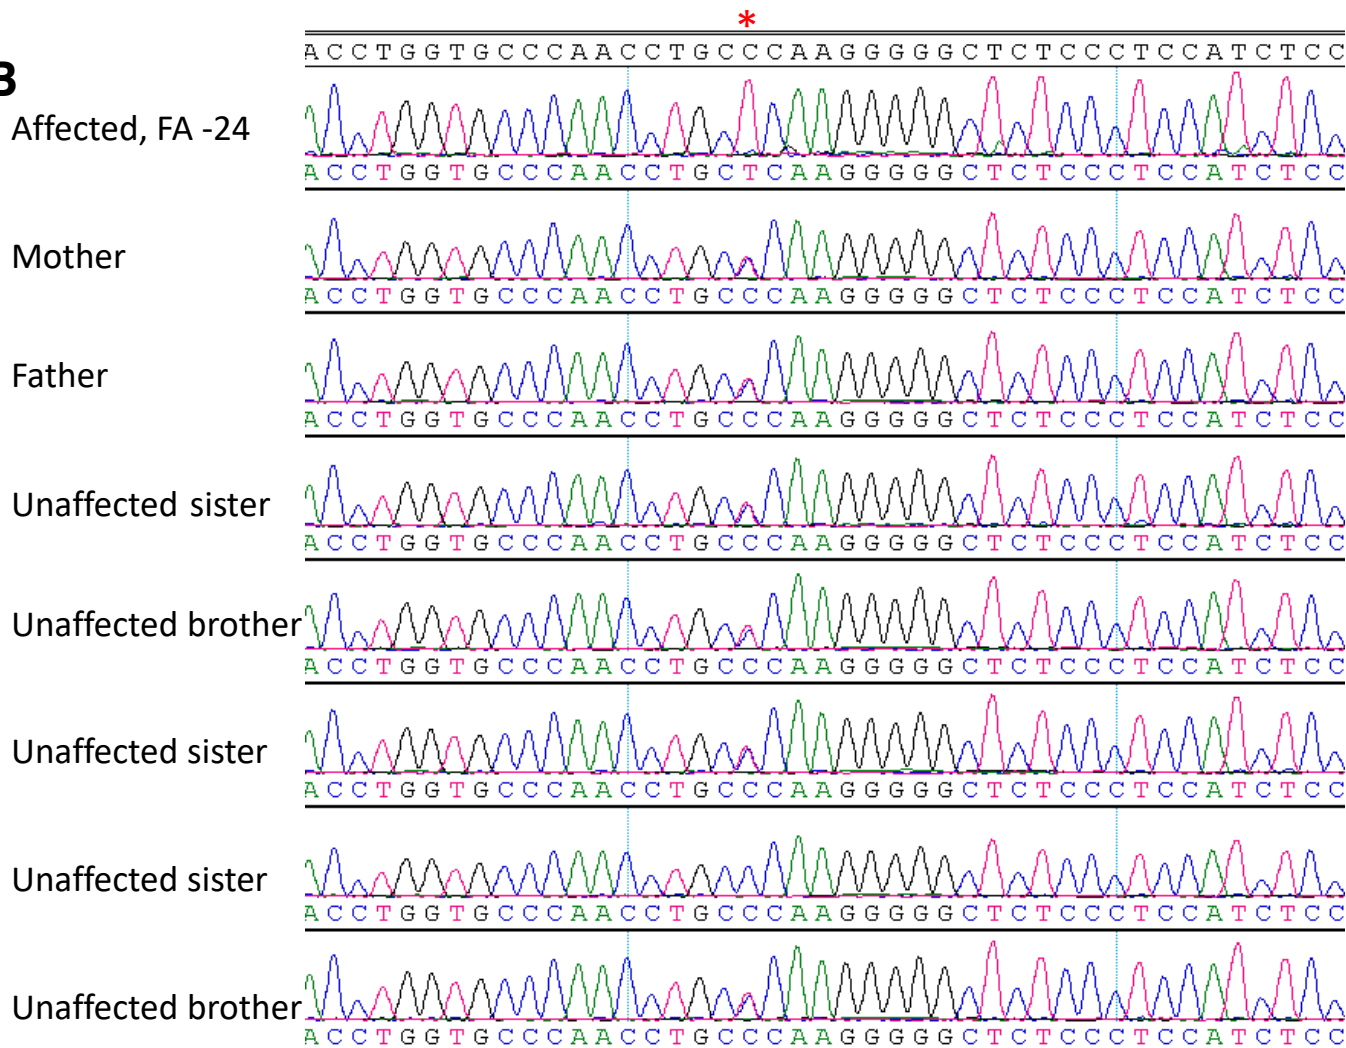

**Suppl. Figure 6. Family pedigree and Sanger sequencing traces of SYNPO mutation.**

**A)** Family pedigree structures is shown. **B)** Sanger sequencing traces of parents and sibling of FA-24 are indicated. Note that only the affected individual FA -21 has a homozygous mutation, while the patients parents and siblings are either unaffected heterozygous carrier or wild type for the mutation. \*marks the mutation.



**Supplemental Table 1: List of 63 genes that lead to proteinuria/ nephrotic syndrome in mice in case of a global knockout.** Genes that are underlined have a published human nephrotic syndrome phenotype.

| <b>Gene Symbol</b>    | <b>PMID #</b> | <b>Protein-uria</b> | <b>FSGS</b> | <b>FPE</b> | <b>In-duction*</b> | <b>Human Disease (OMIN)</b>                                     | <b>Ref</b> |
|-----------------------|---------------|---------------------|-------------|------------|--------------------|-----------------------------------------------------------------|------------|
| <i>ADIPOQ</i>         | 18431508      | y                   | n           | y          | n                  | -                                                               | 1          |
| <i>AKT2</i>           | 24056770      | y                   | y           | y          | n                  | Hypoinsulinemic, hypoglycemia with Hemihypertrophy (AD, 240900) | 2          |
| <i>AMPD2</i>          | 22212473      | y                   | n           | y          | n                  | Pontocerebellar Hypoplasia, type 9 (AR, 615809)                 | 3          |
| <u><i>ARHGDI1</i></u> | 10498891      | y                   | y           | y          | n                  | NS (615244)                                                     | 4          |
| <i>CCN1</i>           | 16847066      | y                   | y           | y          | y                  | -                                                               | 5          |
| <i>CCR1</i>           | 10587518      | y                   | y           | y          | y                  | -                                                               | 6          |
| <i>CD151</i>          | 18787104      | y                   | y           | y          | n                  | -                                                               | 7          |
| <u><i>CD2AP</i></u>   | 17713465      | y                   | y           | n          | n                  | NS (607832)                                                     | 8          |
| <i>CD38</i>           | 21992601      | y                   | y           | y          | n                  | -                                                               | 9          |
| <i>CD55</i>           | 12003997      | y                   | n           | y          | y                  | Complement hyperactivation (AR, 226300)                         | 10         |
| <i>CHD2</i>           | 19142019      | y                   | n           | n          | n                  | Epileptic encephalopathy (AD, 615369)                           | 11         |
| <i>CLIC5</i>          | 20664558      | y                   | n           | y          | n                  | Deafness (AR, 616042)                                           | 12         |
| <i>COL17A1</i>        | 22457199      | y                   | n           | y          | n                  | Epidermolysis bullosa (AR, AD 226650/122400)                    | 13         |
| <i>COL18A1</i>        | 21193414      | y                   | n           | y          | n                  | Knobloch syndrome (AR, 267750)                                  | 14         |
| <i>CRIM1</i>          | 17460146      | y                   | DMS         | y          | n                  | -                                                               | 15         |
| <i>DDR1</i>           | 15200417      | y                   | n           | y          | n                  | -                                                               | 16         |
| <i>EBF1</i>           | 24172684      | y                   | y           | y          | n                  | -                                                               | 17         |
| <i>EDN1</i>           | 9077548       | y                   | y           | n          | n                  | Auriculocondylar syndrome (AR, 615706)                          | 18         |
| <i>GNE</i>            | 17549255      | y                   | y           | y          | n                  | Nonaka myopathy (AR, 605820)                                    | 19         |
| <i>GOLM1</i>          | 18830387      | n/a                 | y           | n          | n                  | -                                                               | 20         |
| <i>GRM1</i>           | 21356376      | y                   | y           | y          | n                  | Spinocerebellar ataxia (AR, AD,                                 | 21         |



|                 |                  |     |   |   |   |                                                                                                   |                                   |
|-----------------|------------------|-----|---|---|---|---------------------------------------------------------------------------------------------------|-----------------------------------|
|                 |                  |     |   |   |   | 614831,617691)                                                                                    |                                   |
| <i>GSTK1</i>    | 21826057         | y   | n | y | n | -                                                                                                 | 22                                |
| <i>ITGA1</i>    | 15277235         | y   | y | y | y | -                                                                                                 | 23                                |
| <i>ITGA3</i>    | 8951069          | y   | n | y | n | NS, Epidermolysis bullosa, interstitial lung disease (AR, 614748)                                 | 24                                |
| <i>ITGB8</i>    | 20826576         | y   | y | y | y | -                                                                                                 | 25                                |
| <i>ITSN2</i>    | 29773874         | y   | n | y | y | NS (AR, -)                                                                                        | 26                                |
| <i>KIRREL</i>   | 11416156         | y   | n | y | n | NS (AR, -)                                                                                        | 27                                |
| <i>KL</i>       | 27151926         | y   | n | n | n | -                                                                                                 | 28                                |
| <i>KMO</i>      | 27020856         | y   | n | y | n | -                                                                                                 | 29                                |
| <i>LAMA5</i>    | 20150535         | y   | y | y | n | NS (AR, -)                                                                                        | 30                                |
| <i>LAMB2</i>    | 7670489          | y   | n | y | n | NS, Pierson syndrome (AR 609049)                                                                  | 31                                |
| <i>LGALS3</i>   | 11689472         | y   | y | n | y | -                                                                                                 | 32                                |
| <i>LGMN</i>     | 21292981         | y   | n | n | n | -                                                                                                 | 33                                |
| <i>MAFB</i>     | 16847325         | n/a | n | y | n | Duane retraction syndrome (AD, 617041), multicentric carpotarsal osteolysis syndrome (AD, 166300) | 34                                |
| <i>MAGI2</i>    | 25271328         | y   | y | y | n | NS (AR, 617609)                                                                                   | 35                                |
| <i>MAPKAPK2</i> | 29187369         | y   | y | n | y | -                                                                                                 | 36                                |
| <i>MAPKAPK3</i> | 29187369         | y   | y | n | y | Macular dystrophy,(AD, 617111)                                                                    | 36                                |
| <i>MPV17</i>    | 10233845,1696177 | y   | y | y | n | CMT (AR 618400), Mitochondrial DNA depletion syndrome 6 (AR, 256810)                              | 37, 38                            |
| <i>MYO1E</i>    | 19005011         | y   | y | y | n | NS (AR, 614131)                                                                                   | 39                                |
| <i>NOS1AP</i>   | unpublished      | y   | n | y | n | -                                                                                                 | Majmundar, personal communication |
| <i>PDGFB</i>    | 12897053         | y   | y | n | n | Basal ganglia calcification (AD, 615493)                                                          | 40                                |
| <i>PIK3C2A</i>  | 20974805         | y   | y | y | n | Oculoskeletodental syndrome (AR, 603601)                                                          | 41                                |

|                        |          |     |   |   |   |                                                               |    |
|------------------------|----------|-----|---|---|---|---------------------------------------------------------------|----|
| <i>PNPLA2</i>          | 28194887 | y   | n | y | n | Neutral lipid storage disease with myopathy (AR, 610717)      | 42 |
| <i>PODXL</i>           | 11435469 | n   | y | y | n | -                                                             | 43 |
| <i>PTGS2</i>           | 8521477  | n/a | y | y | n | -                                                             | 44 |
| <i>PTPRO</i>           | 11086029 | n   | y | y | n | NS (AR, 614196)                                               | 45 |
| <i>RHPN1</i>           | 25071083 | y   | y | y | n | -                                                             | 46 |
| <i>RRM2B</i>           | 15723268 | y   | y | y | n | Mitochondrial DNA depletion syndrome (AR, 612075)             | 47 |
| <i>SCARB2</i>          | 12620969 | y   | n | n | n | Epilepsy (AR, 254900)                                         | 48 |
| <i>SCGB1A1</i>         | 9162006  | y   | y | n | n | -                                                             | 49 |
| <i>SEMA3A</i>          | 19906865 | y   | y | y | n | Hypogonadotropic hypogonadism (AD, 614897)                    | 50 |
| <i>SEMA3G</i>          | 27180624 | y   | n | y | y | -                                                             | 51 |
| <i>SGK3</i>            | 28935820 | y   | n | y | n | -                                                             | 52 |
| <i>SH3GL1</i>          | 23187129 | y   | n | y | n | Leukemia (AD, 601626)                                         | 53 |
| <i>SH3GL2</i>          | 23187129 | y   | n | y | n | -                                                             | 53 |
| <i>SH3GL3</i>          | 23187129 | y   | n | y | n | -                                                             | 53 |
| <i>SHROOM3</i>         | 26940091 | y   | y | y | n | -                                                             | 54 |
| <i>SYNJ1</i>           | 23187129 | y   | n | y | n | Epileptic encephalopathy (AR, 617389), Parkinson (AR, 615530) | 53 |
| <i>SYNPO</i>           | 15841212 | y   | n | y | y | -                                                             | 55 |
| <i>TAL1</i>            | 1836514  | n/a | y | y | n | Leukemia (613065)                                             | 56 |
| <i>TENC1/<br/>TNS2</i> | 16688531 | y   | n | n | n | -                                                             | 57 |
| <i>TK1</i>             | 12559842 | n/a | y | n | n | -                                                             | 58 |
| <i>TNS1</i>            | 9087448  | n/a | y | n | n | -                                                             | 59 |

FPE, foot process effacement; FSGS, focal segmental glomerulosclerosis; n, no; Ref, reference; y, yes. \*Induction with substances as LPS or Adriamycin.

## References

1. Sharma K, Ramachandrarao S, Qiu G, *et al.* Adiponectin regulates albuminuria and podocyte function in mice. *J Clin Invest* 2008; **118**: 1645-1656.
2. Canaud G, Bienaime F, Viau A, *et al.* AKT2 is essential to maintain podocyte viability and function during chronic kidney disease. *Nat Med* 2013; **19**: 1288-1296.
3. Toyama K, Morisaki H, Cheng J, *et al.* Proteinuria in AMPD2-deficient mice. *Genes Cells* 2012; **17**: 28-38.
4. Togawa A, Miyoshi J, Ishizaki H, *et al.* Progressive impairment of kidneys and reproductive organs in mice lacking Rho GDIalpha. *Oncogene* 1999; **18**: 5373-5380.
5. Griffin SV, Olivier JP, Pippin JW, *et al.* Cyclin I protects podocytes from apoptosis. *J Biol Chem* 2006; **281**: 28048-28057.
6. Topham PS, Csizmadia V, Soler D, *et al.* Lack of chemokine receptor CCR1 enhances Th1 responses and glomerular injury during nephrotoxic nephritis. *J Clin Invest* 1999; **104**: 1549-1557.
7. Baleato RM, Guthrie PL, Gubler MC, *et al.* Deletion of CD151 results in a strain-dependent glomerular disease due to severe alterations of the glomerular basement membrane. *Am J Pathol* 2008; **173**: 927-937.
8. Shih NY, Li J, Karpitskii V, *et al.* Congenital nephrotic syndrome in mice lacking CD2-associated protein. *Science* 1999; **286**: 312-315.
9. Boini KM, Xia M, Xiong J, *et al.* Implication of CD38 gene in podocyte epithelial-to-mesenchymal transition and glomerular sclerosis. *J Cell Mol Med* 2012; **16**: 1674-1685.
10. Lin F, Emancipator SN, Salant DJ, *et al.* Decay-accelerating factor confers protection against complement-mediated podocyte injury in acute nephrotoxic nephritis. *Lab Invest* 2002; **82**: 563-569.
11. Marfella CG, Henninger N, LeBlanc SE, *et al.* A mutation in the mouse Chd2 chromatin remodeling enzyme results in a complex renal phenotype. *Kidney Blood Press Res* 2008; **31**: 421-432.
12. Pierchala BA, Munoz MR, Tsui CC. Proteomic analysis of the slit diaphragm complex: CLIC5 is a protein critical for podocyte morphology and function. *Kidney Int* 2010; **78**: 868-882.

13. Hurskainen T, Moilanen J, Sormunen R, *et al.* Transmembrane collagen XVII is a novel component of the glomerular filtration barrier. *Cell Tissue Res* 2012; **348**: 579-588.
14. Kinnunen AI, Sormunen R, Elamaa H, *et al.* Lack of collagen XVIII long isoforms affects kidney podocytes, whereas the short form is needed in the proximal tubular basement membrane. *J Biol Chem* 2011; **286**: 7755-7764.
15. Wilkinson L, Gilbert T, Kinna G, *et al.* Crim1KST264/KST264 mice implicate Crim1 in the regulation of vascular endothelial growth factor-A activity during glomerular vascular development. *J Am Soc Nephrol* 2007; **18**: 1697-1708.
16. Gross O, Beirowski B, Harvey SJ, *et al.* DDR1-deficient mice show localized subepithelial GBM thickening with focal loss of slit diaphragms and proteinuria. *Kidney Int* 2004; **66**: 102-111.
17. Fretz JA, Nelson T, Velazquez H, *et al.* Early B-cell factor 1 is an essential transcription factor for postnatal glomerular maturation. *Kidney Int* 2014; **85**: 1091-1102.
18. Hocher B, Thone-Reineke C, Rohmeiss P, *et al.* Endothelin-1 transgenic mice develop glomerulosclerosis, interstitial fibrosis, and renal cysts but not hypertension. *J Clin Invest* 1997; **99**: 1380-1389.
19. Galeano B, Klootwijk R, Manoli I, *et al.* Mutation in the key enzyme of sialic acid biosynthesis causes severe glomerular proteinuria and is rescued by N-acetylmannosamine. *J Clin Invest* 2007; **117**: 1585-1594.
20. Wright LM, Yong S, Picken MM, *et al.* Decreased survival and hepato-renal pathology in mice with C-terminally truncated GP73 (GOLPH2). *Int J Clin Exp Pathol* 2009; **2**: 34-47.
21. Puliti A, Rossi PI, Caridi G, *et al.* Albuminuria and glomerular damage in mice lacking the metabotropic glutamate receptor 1. *Am J Pathol* 2011; **178**: 1257-1269.
22. Blackburn AC, Coggan M, Shield AJ, *et al.* Glutathione transferase kappa deficiency causes glomerular nephropathy without overt oxidative stress. *Lab Invest* 2011; **91**: 1572-1583.
23. Chen X, Moeckel G, Morrow JD, *et al.* Lack of integrin alpha1beta1 leads to severe glomerulosclerosis after glomerular injury. *Am J Pathol* 2004; **165**: 617-630.
24. Kreidberg JA, Donovan MJ, Goldstein SL, *et al.* Alpha 3 beta 1 integrin has a crucial role in kidney and lung organogenesis. *Development* 1996; **122**: 3537-3547.

25. Hartner A, Cordasic N, Menendez-Castro C, *et al.* Lack of  $\alpha$ 8-integrin aggravates podocyte injury in experimental diabetic nephropathy. *Am J Physiol Renal Physiol* 2010; **299**: F1151-1157.
26. Ashraf S, Kudo H, Rao J, *et al.* Mutations in six nephrosis genes delineate a pathogenic pathway amenable to treatment. *Nat Commun* 2018; **9**: 1960.
27. Donoviel DB, Freed DD, Vogel H, *et al.* Proteinuria and perinatal lethality in mice lacking NEPH1, a novel protein with homology to NEPHRIN. *Mol Cell Biol* 2001; **21**: 4829-4836.
28. Kim JH, Xie J, Hwang KH, *et al.* Klotho May Ameliorate Proteinuria by Targeting TRPC6 Channels in Podocytes. *J Am Soc Nephrol* 2017; **28**: 140-151.
29. Korstanje R, Deutsch K, Bolanos-Palmieri P, *et al.* Loss of Kynurenine 3-Mono-oxygenase Causes Proteinuria. *J Am Soc Nephrol* 2016; **27**: 3271-3277.
30. Goldberg S, Adair-Kirk TL, Senior RM, *et al.* Maintenance of glomerular filtration barrier integrity requires laminin alpha5. *J Am Soc Nephrol* 2010; **21**: 579-586.
31. Noakes PG, Miner JH, Gautam M, *et al.* The renal glomerulus of mice lacking  $\alpha$ -laminin/laminin beta 2: nephrosis despite molecular compensation by laminin beta 1. *Nat Genet* 1995; **10**: 400-406.
32. Pugliese G, Pricci F, Iacobini C, *et al.* Accelerated diabetic glomerulopathy in galectin-3/AGE receptor 3 knockout mice. *FASEB J* 2001; **15**: 2471-2479.
33. Miller G, Matthews SP, Reinheckel T, *et al.* Asparagine endopeptidase is required for normal kidney physiology and homeostasis. *FASEB J* 2011; **25**: 1606-1617.
34. Moriguchi T, Hamada M, Morito N, *et al.* MafB is essential for renal development and F4/80 expression in macrophages. *Mol Cell Biol* 2006; **26**: 5715-5727.
35. Balbas MD, Burgess MR, Murali R, *et al.* MAGI-2 scaffold protein is critical for kidney barrier function. *Proc Natl Acad Sci U S A* 2014; **111**: 14876-14881.
36. Nie X, Chanley MA, Pengal R, *et al.* Pharmacological and genetic inhibition of downstream targets of p38 MAPK in experimental nephrotic syndrome. *Am J Physiol Renal Physiol* 2018; **314**: F602-F613.

37. Binder CJ, Weiher H, Exner M, *et al.* Glomerular overproduction of oxygen radicals in Mpv17 gene-inactivated mice causes podocyte foot process flattening and proteinuria: A model of steroid-resistant nephrosis sensitive to radical scavenger therapy. *Am J Pathol* 1999; **154**: 1067-1075.
38. Weiher H, Noda T, Gray DA, *et al.* Transgenic mouse model of kidney disease: insertional inactivation of ubiquitously expressed gene leads to nephrotic syndrome. *Cell* 1990; **62**: 425-434.
39. Krendel M, Kim SV, Willinger T, *et al.* Disruption of Myosin 1e promotes podocyte injury. *J Am Soc Nephrol* 2009; **20**: 86-94.
40. Lindblom P, Gerhardt H, Liebner S, *et al.* Endothelial PDGF-B retention is required for proper investment of pericytes in the microvessel wall. *Genes Dev* 2003; **17**: 1835-1840.
41. Harris DP, Vogel P, Wims M, *et al.* Requirement for class II phosphoinositide 3-kinase C2alpha in maintenance of glomerular structure and function. *Mol Cell Biol* 2011; **31**: 63-80.
42. Chen W, Jiang Y, Han J, *et al.* Atgl deficiency induces podocyte apoptosis and leads to glomerular filtration barrier damage. *FEBS J* 2017; **284**: 1070-1081.
43. Doyonnas R, Kershaw DB, Duhme C, *et al.* Anuria, omphalocele, and perinatal lethality in mice lacking the CD34-related protein podocalyxin. *J Exp Med* 2001; **194**: 13-27.
44. Morham SG, Langenbach R, Loftin CD, *et al.* Prostaglandin synthase 2 gene disruption causes severe renal pathology in the mouse. *Cell* 1995; **83**: 473-482.
45. Wharram BL, Goyal M, Gillespie PJ, *et al.* Altered podocyte structure in GLEPP1 (Ptpro)-deficient mice associated with hypertension and low glomerular filtration rate. *J Clin Invest* 2000; **106**: 1281-1290.
46. Lal MA, Andersson AC, Katayama K, *et al.* Rhophilin-1 is a key regulator of the podocyte cytoskeleton and is essential for glomerular filtration. *J Am Soc Nephrol* 2015; **26**: 647-662.
47. Powell DR, Desai U, Sparks MJ, *et al.* Rapid development of glomerular injury and renal failure in mice lacking p53R2. *Pediatr Nephrol* 2005; **20**: 432-440.
48. Gamp AC, Tanaka Y, Lullmann-Rauch R, *et al.* LIMP-2/LGP85 deficiency causes ureteric pelvic junction obstruction, deafness and peripheral neuropathy in mice. *Hum Mol Genet* 2003; **12**: 631-646.

49. Zhang Z, Kundu GC, Yuan CJ, *et al.* Severe fibronectin-deposit renal glomerular disease in mice lacking uteroglobin. *Science* 1997; **276**: 1408-1412.
50. Reidy KJ, Villegas G, Teichman J, *et al.* Semaphorin3a regulates endothelial cell number and podocyte differentiation during glomerular development. *Development* 2009; **136**: 3979-3989.
51. Ishibashi R, Takemoto M, Akimoto Y, *et al.* A novel podocyte gene, semaphorin 3G, protects glomerular podocyte from lipopolysaccharide-induced inflammation. *Sci Rep* 2016; **6**: 25955.
52. Peng LQ, Zhao H, Liu S, *et al.* Lack of serum- and glucocorticoid-inducible kinase 3 leads to podocyte dysfunction. *FASEB J* 2018; **32**: 576-587.
53. Soda K, Balkin DM, Ferguson SM, *et al.* Role of dynamin, synaptojanin, and endophilin in podocyte foot processes. *J Clin Invest* 2012; **122**: 4401-4411.
54. Khalili H, Sull A, Sarin S, *et al.* Developmental Origins for Kidney Disease Due to Shroom3 Deficiency. *J Am Soc Nephrol* 2016; **27**: 2965-2973.
55. Asanuma K, Kim K, Oh J, *et al.* Synaptopodin regulates the actin-bundling activity of alpha-actinin in an isoform-specific manner. *J Clin Invest* 2005; **115**: 1188-1198.
56. Shultz LD, Lane PW, Coman DR, *et al.* Hairpatches, a single gene mutation characterized by progressive renal disease and alopecia in the mouse. A potential model for a newly described heritable human disorder. *Lab Invest* 1991; **65**: 588-600.
57. Cho AR, Uchio-Yamada K, Torigai T, *et al.* Deficiency of the tensin2 gene in the ICGN mouse: an animal model for congenital nephrotic syndrome. *Mamm Genome* 2006; **17**: 407-416.
58. Dobrovolsky VN, Bucci T, Heflich RH, *et al.* Mice deficient for cytosolic thymidine kinase gene develop fatal kidney disease. *Mol Genet Metab* 2003; **78**: 1-10.
59. Lo SH, Yu QC, Degenstein L, *et al.* Progressive kidney degeneration in mice lacking tensin. *J Cell Biol* 1997; **136**: 1349-1361.

**Suppl. Table 2: Overview of 12 human nephrotic syndrome or phenocopy genes that had a nephrotic mouse with a global knockout published before the human equivalent was reported.**

| Human gene name<br>(mouse gene name) | Transcript  | Paper published for human<br>phenotype | Paper published for mouse<br>phenotype |
|--------------------------------------|-------------|----------------------------------------|----------------------------------------|
| <b>ARHGDI1</b> ( <i>Arhgdia</i> )    | NM_004309.6 | 1, 2                                   | 3                                      |
| <b>CD2AP</b> ( <i>Cd2ap</i> )        | NM_012120.3 | 4, 5                                   | 6                                      |
| <b>ITGA3</b> ( <i>Itga3</i> )        | NM_002204.4 | 7                                      | 8                                      |
| <b>ITSN2</b> ( <i>Itsn2</i> )        | NM_006277.2 | 9                                      | 9                                      |
| <b>KIRREL1</b> ( <i>Kirrel</i> )     | NM_018240.7 | 10                                     | 11                                     |
| <b>LAMA5</b> ( <i>Lama5</i> )        | NM_005560.6 | 12                                     | 13                                     |
| <b>LAMB2</b> ( <i>Lamb2</i> )        | NM_002292.4 | 14                                     | 15                                     |
| <b>MAGI2</b> ( <i>Magi2</i> )        | NM_012301.4 | 16                                     | 17                                     |
| <b>MYO1E</b> ( <i>Myo1e</i> )        | NM_004998.4 | 18                                     | 19                                     |
| <b>PTPRO</b> ( <i>Ptpro</i> )        | NM_030667.3 | 20                                     | 21                                     |
| <b>SCARB2</b> ( <i>Scarb2</i> )      | NM_005506.4 | 22                                     | 23                                     |
| <b>TNS2</b> ( <i>Tns2</i> )          | NM_015319.2 | 9                                      | 24                                     |

## Literature

1. Gee HY, Saisawat P, Ashraf S, *et al.* ARHGDI1 mutations cause nephrotic syndrome via defective RHO GTPase signaling. *J Clin Invest* 2013; **123**: 3243-3253.
2. Gupta IR, Baldwin C, Auguste D, *et al.* ARHGDI1: a novel gene implicated in nephrotic syndrome. *J Med Genet* 2013; **50**: 330-338.
3. Togawa A, Miyoshi J, Ishizaki H, *et al.* Progressive impairment of kidneys and reproductive organs in mice lacking Rho GD1alpha. *Oncogene* 1999; **18**: 5373-5380.



4. Lowik MM, Groenen PJ, Pronk I, *et al.* Focal segmental glomerulosclerosis in a patient homozygous for a CD2AP mutation. *Kidney Int* 2007; **72**: 1198-1203.
5. Kim JM, Wu H, Green G, *et al.* CD2-associated protein haploinsufficiency is linked to glomerular disease susceptibility. *Science* 2003; **300**: 1298-1300.
6. Shih NY, Li J, Karpitskii V, *et al.* Congenital nephrotic syndrome in mice lacking CD2-associated protein. *Science* 1999; **286**: 312-315.
7. Has C, Sparta G, Kiritsi D, *et al.* Integrin alpha3 mutations with kidney, lung, and skin disease. *N Engl J Med* 2012; **366**: 1508-1514.
8. Kreidberg JA, Donovan MJ, Goldstein SL, *et al.* Alpha 3 beta 1 integrin has a crucial role in kidney and lung organogenesis. *Development* 1996; **122**: 3537-3547.
9. Ashraf S, Kudo H, Rao J, *et al.* Mutations in six nephrosis genes delineate a pathogenic pathway amenable to treatment. *Nat Commun* 2018; **9**: 1960.
10. Solanki AK, Widmeier E, Arif E, *et al.* Mutations in KIRREL1, a slit diaphragm component, cause steroid-resistant nephrotic syndrome. *Kidney Int* 2019; **96**: 883-889.
11. Donoviel DB, Freed DD, Vogel H, *et al.* Proteinuria and perinatal lethality in mice lacking NEPH1, a novel protein with homology to NEPHRIN. *Mol Cell Biol* 2001; **21**: 4829-4836.
12. Braun DA, Warejko JK, Ashraf S, *et al.* Genetic variants in the LAMA5 gene in pediatric nephrotic syndrome. *Nephrol Dial Transplant* 2019; **34**: 485-493.
13. Goldberg S, Adair-Kirk TL, Senior RM, *et al.* Maintenance of glomerular filtration barrier integrity requires laminin alpha5. *J Am Soc Nephrol* 2010; **21**: 579-586.

14. Zenker M, Tralau T, Lennert T, *et al.* Congenital nephrosis, mesangial sclerosis, and distinct eye abnormalities with microcoria: an autosomal recessive syndrome. *Am J Med Genet A* 2004; **130A**: 138-145.
15. Noakes PG, Miner JH, Gautam M, *et al.* The renal glomerulus of mice lacking s-laminin/laminin beta 2: nephrosis despite molecular compensation by laminin beta 1. *Nat Genet* 1995; **10**: 400-406.
16. Bierzynska A, Soderquest K, Dean P, *et al.* MAGI2 Mutations Cause Congenital Nephrotic Syndrome. *J Am Soc Nephrol* 2017; **28**: 1614-1621.
17. Balbas MD, Burgess MR, Murali R, *et al.* MAGI-2 scaffold protein is critical for kidney barrier function. *Proc Natl Acad Sci U S A* 2014; **111**: 14876-14881.
18. Mele C, Iatropoulos P, Donadelli R, *et al.* MYO1E mutations and childhood familial focal segmental glomerulosclerosis. *N Engl J Med* 2011; **365**: 295-306.
19. Krendel M, Kim SV, Willinger T, *et al.* Disruption of Myosin 1e promotes podocyte injury. *J Am Soc Nephrol* 2009; **20**: 86-94.
20. Ozaltin F, Ibsirlioglu T, Taskiran EZ, *et al.* Disruption of PTPRO causes childhood-onset nephrotic syndrome. *Am J Hum Genet* 2011; **89**: 139-147.
21. Wharram BL, Goyal M, Gillespie PJ, *et al.* Altered podocyte structure in GLEPP1 (Ptpro)-deficient mice associated with hypertension and low glomerular filtration rate. *J Clin Invest* 2000; **106**: 1281-1290.
22. Berkovic SF, Dibbens LM, Oshlack A, *et al.* Array-based gene discovery with three unrelated subjects shows SCARB2/LIMP-2 deficiency causes myoclonus epilepsy and glomerulosclerosis. *Am J Hum Genet* 2008; **82**: 673-684.
23. Gamp AC, Tanaka Y, Lullmann-Rauch R, *et al.* LIMP-2/LGP85 deficiency causes ureteric pelvic junction obstruction, deafness and peripheral neuropathy in mice. *Hum Mol Genet* 2003; **12**: 631-646.

24. Cho AR, Uchio-Yamada K, Torigai T, *et al.* Deficiency of the tensin2 gene in the ICGN mouse: an animal model for congenital nephrotic syndrome. *Mamm Genome* 2006; **17**: 407-416.

**Suppl. Table 3: Overview of 12 global knockout mice that were excluded in this study as the equivalent human NS phenotype was published before the mouse model was reported.**

| <b>Human gene name<br/>(mouse gene name)</b> | <b>Transcript</b> | <b>Paper published for human<br/>phenotype</b> | <b>Paper published for mouse<br/>phenotype</b> |
|----------------------------------------------|-------------------|------------------------------------------------|------------------------------------------------|
| <b><i>ADCK4 (Coq8b)</i></b>                  | NM_024876.4       | 1                                              | 2                                              |
| <b><i>COL4A3 (Col4a3)</i></b>                | NM_000091.5       | 3                                              | 4, 5                                           |
| <b><i>COL4A4 (Col4a4)</i></b>                | NM_000092.5       | 3                                              | 6                                              |
| <b><i>COL4A5 (Col4a5)</i></b>                | NM_033380.1       | 7                                              | 8                                              |
| <b><i>CUBN (Cubn)</i></b>                    | NM_001081.4       | 9                                              | 10                                             |
| <b><i>INF2 (Inf2)</i></b>                    | NM_022489.4       | 11                                             | 12                                             |
| <b><i>LMX1B (Lmx1b)</i></b>                  | NM_002316         | 13                                             | 14                                             |
| <b><i>NPHS1 (Nphs1)</i></b>                  | NM_004646         | 15                                             | 16                                             |
| <b><i>NPHS2 (Nphs2)</i></b>                  | NM_014625.4       | 17                                             | 18, 19                                         |
| <b><i>PDSS2 (Pdss2)</i></b>                  | NM_020381.4       | 20                                             | 21, 22                                         |
| <b><i>SMARCAL1 (Smarcal1)</i></b>            | NM_014140.4       | 23                                             | 24                                             |
| <b><i>WT1 (Wt1)</i></b>                      | NM_024426.5       | 25                                             | 26 27                                          |

## Literature

1. Ashraf S, Kudo H, Rao J, *et al.* Mutations in six nephrosis genes delineate a pathogenic pathway amenable to treatment. *Nat Commun* 2018; **9**: 1960.
2. Widmeier E, Yu S, Nag A, *et al.* ADCK4 Deficiency Destabilizes the Coenzyme Q Complex, Which Is Rescued by 2,4-Dihydroxybenzoic Acid Treatment. *J Am Soc Nephrol* 2020.
3. Mochizuki T, Lemmink HH, Mariyama M, *et al.* Identification of mutations in the alpha 3(IV) and alpha 4(IV) collagen genes in autosomal recessive Alport syndrome. *Nat Genet* 1994; **8**: 77-81.

4. Miner JH, Sanes JR. Molecular and functional defects in kidneys of mice lacking collagen alpha 3(IV): implications for Alport syndrome. *J Cell Biol* 1996; **135**: 1403-1413.
5. Shih NY, Li J, Karpitskii V, *et al.* Congenital nephrotic syndrome in mice lacking CD2-associated protein. *Science* 1999; **286**: 312-315.
6. Korstanje R, Caputo CR, Doty RA, *et al.* A mouse Col4a4 mutation causing Alport glomerulosclerosis with abnormal collagen alpha3alpha4alpha5(IV) trimers. *Kidney Int* 2014; **85**: 1461-1468.
7. Barker DF, Hostikka SL, Zhou J, *et al.* Identification of mutations in the COL4A5 collagen gene in Alport syndrome. *Science* 1990; **248**: 1224-1227.
8. Rheault MN, Kren SM, Thielen BK, *et al.* Mouse model of X-linked Alport syndrome. *J Am Soc Nephrol* 2004; **15**: 1466-1474.
9. Kristiansen M, Aminoff M, Jacobsen C, *et al.* Cubilin P1297L mutation associated with hereditary megaloblastic anemia 1 causes impaired recognition of intrinsic factor-vitamin B(12) by cubilin. *Blood* 2000; **96**: 405-409.
10. Amsellem S, Gburek J, Hamard G, *et al.* Cubilin is essential for albumin reabsorption in the renal proximal tubule. *J Am Soc Nephrol* 2010; **21**: 1859-1867.
11. Brown EJ, Schlondorff JS, Becker DJ, *et al.* Mutations in the formin gene INF2 cause focal segmental glomerulosclerosis. *Nat Genet* 2010; **42**: 72-76.
12. Subramanian B, Sun H, Yan P, *et al.* Mice with mutant Inf2 show impaired podocyte and slit diaphragm integrity in response to protamine-induced kidney injury. *Kidney Int* 2016; **90**: 363-372.
13. Dreyer SD, Morello R, German MS, *et al.* LMX1B transactivation and expression in nail-patella syndrome. *Hum Mol Genet* 2000; **9**: 1067-1074.

14. Rohr C, Prestel J, Heidet L, *et al.* The LIM-homeodomain transcription factor Lmx1b plays a crucial role in podocytes. *J Clin Invest* 2002; **109**: 1073-1082.
15. Kestila M, Lenkkeri U, Mannikko M, *et al.* Positionally cloned gene for a novel glomerular protein--nephrin--is mutated in congenital nephrotic syndrome. *Mol Cell* 1998; **1**: 575-582.
16. Putaala H, Soininen R, Kilpelainen P, *et al.* The murine nephrin gene is specifically expressed in kidney, brain and pancreas: inactivation of the gene leads to massive proteinuria and neonatal death. *Hum Mol Genet* 2001; **10**: 1-8.
17. Fuchshuber A, Janssen F, Gribouval O, *et al.* Presymptomatic diagnosis of familial steroid-resistant nephrotic syndrome. *Lancet* 1996; **347**: 1050-1051.
18. Philippe A, Weber S, Esquivel EL, *et al.* A missense mutation in podocin leads to early and severe renal disease in mice. *Kidney Int* 2008; **73**: 1038-1047.
19. Roselli S, Heidet L, Sich M, *et al.* Early glomerular filtration defect and severe renal disease in podocin-deficient mice. *Mol Cell Biol* 2004; **24**: 550-560.
20. Lopez LC, Schuelke M, Quinzii CM, *et al.* Leigh syndrome with nephropathy and CoQ10 deficiency due to decaprenyl diphosphate synthase subunit 2 (PDSS2) mutations. *Am J Hum Genet* 2006; **79**: 1125-1129.
21. Lyon MF, Hulse EV. An inherited kidney disease of mice resembling human nephronophthisis. *J Med Genet* 1971; **8**: 41-48.
22. Peng LQ, Zhao H, Liu S, *et al.* Lack of serum- and glucocorticoid-inducible kinase 3 leads to podocyte dysfunction. *FASEB J* 2018; **32**: 576-587.
23. Boerkoel CF, Takashima H, John J, *et al.* Mutant chromatin remodeling protein SMARCAL1 causes Schimke immunosseous dysplasia. *Nat Genet* 2002; **30**: 215-220.

24. Baradaran-Heravi A, Cho KS, Tolhuis B, *et al.* Penetrance of biallelic SMARCAL1 mutations is associated with environmental and genetic disturbances of gene expression. *Hum Mol Genet* 2012; **21**: 2572-2587.
25. Huff V, Miwa H, Haber DA, *et al.* Evidence for WT1 as a Wilms tumor (WT) gene: intragenic germinal deletion in bilateral WT. *Am J Hum Genet* 1991; **48**: 997-1003.
26. Menke AL, A IJ, Fleming S, *et al.* The wt1-heterozygous mouse; a model to study the development of glomerular sclerosis. *J Pathol* 2003; **200**: 667-674.
27. Ratelade J, Arrondel C, Hamard G, *et al.* A murine model of Denys-Drash syndrome reveals novel transcriptional targets of WT1 in podocytes. *Hum Mol Genet* 2010; **19**: 1-15.

**Suppl. Table 4. Recessive *SYNPO* mutation in 1 family (FA) with nephrotic syndrome.**

| Family | Nucleotide change | Amino acid change | Exon (Zyg)  | PP2   | SIFT | MT | Conser-<br>vation | GnomAD<br>(hom/het/<br>total) | Sex | Ethnic<br>origin | PC | Age of<br>on set | NS type<br>(treatment) | Biopsy | Extra-renal                           |
|--------|-------------------|-------------------|-------------|-------|------|----|-------------------|-------------------------------|-----|------------------|----|------------------|------------------------|--------|---------------------------------------|
| FA     | c.2540C>T         | p.P847L           | 5b<br>(Hom) | 0.998 | Del  | DC | <i>D. rerio</i>   | 0/0/<br>250,754               | M   | Saudi            | Y  | 4 yr             | SDNS                   | ND     | <i>LAMA2</i><br>Muscular<br>dystrophy |

**Abbreviations:** DC, disease causing; Del, deleterious; M, male; GnomAD, Genome Aggregation database (<https://gnomad.broadinstitute.org/>); Hom, homozygous; MT, mutation taster; ND, not done; PC, parental consanguinity; PP2, PolyPhen-2 prediction score; SIFT, "Sorting Tolerant from Intolerant" prediction score; yr, years; Zyg, zygosity.



**Suppl. Table 5: Summary of families with 7 candidate genes**

| <b>Gene symbol</b> | <b>Nr of families identified by unbiased WES</b> | <b>Renal Manifestation</b> | <b>Extrarenal Manifestation</b>  |
|--------------------|--------------------------------------------------|----------------------------|----------------------------------|
| <i>SYNPO</i>       | 1                                                | SDNS                       | -                                |
| <i>DAAM2</i> *     | 4                                                | SRNS                       | 1 patient: adrenal insufficiency |
| <i>PIK3C2A</i>     | 2                                                | SRNS, CNS                  | -                                |
| <i>SEMA3G</i> **   | 3                                                | Proteinuria, SSNS          | -                                |
| <i>SEMA3A</i>      | 1                                                | SSNS                       | -                                |
| <i>NOS1AP</i> ***  | 2                                                | SRNS                       | -                                |
| <i>ITGB8</i>       | 1                                                | NS                         | -                                |

Nr, Number; SDNS, steroid dependent nephrotic syndrome; SRNS, steroid resistant nephrotic syndrome; SSNS, steroid sensitive nephrotic syndrome, WES, whole exome sequencing

\* Schneider, submitted, July 2020, *AJHG*

\*\* extensive functional work ongoing

\*\*\* Majmundar, submitted, July 2020, *Science Advances*
